# Supplementary material for: Developments in Algorithms for Sequence Alignment: A Review
Source: MDPI journal article supplement (doi:10.3390/biom12040546), 2022-04-06
Supplement: s1 [file s1]

**Supplementary Table S1.** The overview of tools and methods mentioned in the review.

| Tools or Methods                   | Typical Features                                          | Working on                                                                   | Year |
|------------------------------------|-----------------------------------------------------------|------------------------------------------------------------------------------|------|
| <b>HHalign</b>                     | pairwise alignment of profile HMMs                        | protein sequences                                                            | 2005 |
| <a href="#">COVID-Align</a>        | pre-built HMM                                             | COVID sequences                                                              | 2021 |
| <b>MAGUS+eHMMs</b>                 | MAGUS and HMM                                             | fragmentary sequences                                                        | 2021 |
| <a href="#">MAFFT-addfragments</a> | designed for adding fragmentary sequences to an alignment | fragmentary sequences addition                                               | 2012 |
| <a href="#">MUMmer</a>             | suffix trees and maximal unique matching subsequences     | pairwise alignment of DNA sequences of very large scale                      | 1999 |
| <a href="#">Minimap</a>            | seed-chain-align                                          | pairwise alignment for nucleotide sequences                                  | 2016 |
| <a href="#">ViralMSA</a>           | massively scalable                                        | viral genomes                                                                | 2021 |
| <a href="#">MAFFT</a>              | FFT                                                       | general use                                                                  | 2002 |
| <a href="#">FAME</a>               | vertical division                                         | general use                                                                  | 2020 |
| <a href="#">FMAAlign</a>           | vertical division                                         | nucleotide sequences                                                         | 2021 |
| <a href="#">MAGUS</a>              | horizontal division and Graph Clustering Merger           | large-scale alignments                                                       | 2020 |
| <a href="#">Super5</a>             | horizontal division                                       | large datasets                                                               | 2021 |
| <a href="#">mBed</a>               | embedding methods                                         | rough guide tree construction                                                | 2010 |
| <a href="#">PartTree</a>           | length-based clustering                                   | rough guide tree construction                                                | 2006 |
| <a href="#">MACSE</a>              | frameshifts and stop codons                               | coding sequences                                                             | 2011 |
| <b>GPCRtm</b>                      | specific to GPCR                                          | scoring systems for GPCR                                                     | 2015 |
| <a href="#">MAHDS</a>              | sophisticated mathematical process                        | highly divergent nucleotide sequences                                        | 2021 |
| <a href="#">HAlign</a>             | suffix trees                                              | sequences of very large scale                                                | 2015 |
| <a href="#">MASC</a>               | suffix trees and Spark Parallel Framework                 | nucleotide sequences                                                         | 2017 |
| <b>chained guide trees</b>         | simple topology                                           | protein families of large number of sequences for structure-based benchmarks | /    |
| <b>PRANK</b>                       | phylogeny-aware progressive alignment                     | alignments for evolutionary analyses                                         | 2008 |
| <a href="#">PAGAN</a>              | phylogeny-aware progressive alignment                     | alignments for evolutionary analyses                                         | 2012 |
| <a href="#">ProPIP</a>             | Poisson Indel Process (explicit mathematical model)       | alignments for evolutionary analyses                                         | 2021 |
| <a href="#">T-Coffee</a>           | consistency objective function                            | general use                                                                  | 2000 |
| <a href="#">ProbCons</a>           | Probabilistic consistency                                 | protein sequences                                                            | 2005 |
| <a href="#">M-Coffee</a>           | consistency objective function                            | alignments combination                                                       | 2006 |
| <b>SATé</b>                        | iteration between re-aligning and tree re-construction    | simultaneous alignment and tree estimation for DNA                           | 2009 |
| <a href="#">FAMSA</a>              | division strategy based on gaps for iterative refinement  | thousands of protein sequences                                               | 2016 |
| <b>SpliVert</b>                    | vertical division strategy for iterative refinement       | refinement of protein sequence alignments                                    | 2020 |
| <a href="#">MO-SAStrE</a>          | multi-objective metaheuristic                             | general use                                                                  | 2013 |
| <a href="#">M2Align</a>            | multi-objective metaheuristic and its parallelization     | general use                                                                  | 2017 |
| <b>SAGA</b>                        | genetic algorithms                                        | general use                                                                  | 1996 |
